# Supplementary material for: Preparation, characterization, and use of novel Cu@Fe3O4 MNPs in the synthesis of tetrahydrobenzimidazo[2,1-b]quinazolin-1(2H)-ones and 2H-indazolo[2,1-b]phthalazine-triones under solvent-free conditions
Source: Royal Society of Chemistry journal article supplement (doi:10.1039/c9ra01509d), 2019-01-01
Supplement: c9ra01509d1.pdf [file c9ra01509d1.pdf]

### All spectral data of 4 and 6 compounds

**Compound (4a):** Mp: >350°C; IR (KBr, cm<sup>-1</sup>): 3446, 2884, 1641, 1617, 1611, 1566; <sup>1</sup>H NMR (400 MHz, DMSO) δ: 0.97 (s, 3H), 1.07 (s, 3H), 1.07-2.28 (m, 4H), 6.63 (s, 1H), 7.11-7.91 (m, 9H), 11.29 (s, 1H) ppm; <sup>13</sup>C NMR (100 MHz, DMSO) δ: 27.3, 32.3, 42.7, 50.1, 55.3, 110.1, 110.3, 118.8, 122.1, 125.8, 127.4, 128.6, 135.4, 136.8, 138.8, 140.2, 150.2, 193.3 ppm.

**Compound (4b):** Mp: >300°C; IR (KBr, cm<sup>-1</sup>): 3544, 3049, 1646, 1620, 1591, 1573; <sup>1</sup>H NMR (400 MHz, DMSO) δ: 0.91 (s, 3H), 1.06 (s, 3H), 2.06-2.74 (m, 4H), 6.65 (s, 1H), 6.98-8.29 (m, 8H), 11.31 (s, 1H) ppm; <sup>13</sup>C NMR (100 MHz, DMSO) δ: 27.7, 29.5, 32.6, 50.3, 56.2, 108.3, 110.6, 116.5, 118.4, 121.8, 125.3, 128.6, 132.5, 132.4, 141.3, 147.3, 152.7, 193.2 ppm.

**Compound (4c):** Mp: >350°C; IR (KBr, cm<sup>-1</sup>): 3540, 3044, 1643, 1611, 1593, 1569; <sup>1</sup>H NMR (400 MHz, DMSO) δ: 0.97 (s, 3H), 1.07 (s, 3H), 2.02-2.87 (m, 4H), 6.61 (s, 1H), 7.19-8.21 (m, 8H), 11.31 (s, 1H) ppm; <sup>13</sup>C NMR (100 MHz, DMSO) δ: 27.1, 32.5, 42.3, 50.3, 56.5, 110.3, 110.5, 118.3, 123.0, 123.5, 129.3, 134.5, 138.6, 141.5, 143.7, 144.4, 152.5, 193.3 ppm.

**Compound (4d):** Mp: >300°C; IR (KBr, cm<sup>-1</sup>): 3546, 3048, 1645, 1613, 1591, 1568; <sup>1</sup>H NMR (400 MHz, DMSO) δ: 0.96 (s, 3H), 1.08 (s, 3H), 2.04-2.24 (d, 1H), 2.52-2.63 (m, 2H), 6.65 (s, 1H), 6.82-7.49 (m, 8H), 11.16 (s, 1H) ppm; <sup>13</sup>C NMR (100 MHz, DMSO) δ: 27.3, 32.7, 42.3, 50.5, 52.3, 110.3, 110.5, 118.3, 123.2, 124.7, 126.5, 129.6, 134.1, 134.5, 138.6, 141.4, 142.6, 149.6, 152.5, 193.2 ppm.

**Compound (4e):** Mp: >300°C; IR (KBr, cm<sup>-1</sup>): 3542, 3048, 1643, 1619, 1593, 1571; <sup>1</sup>H NMR (400 MHz, DMSO) δ: 0.91 (s, 3H), 1.06 (s, 3H), 2.06-2.74 (m, 4H), 6.65 (s, 1H), 6.98-8.29 (m, 8H), 11.31 (s, 1H) ppm; <sup>13</sup>C NMR (100 MHz, DMSO) δ: 27.7, 29.5, 32.8, 50.3, 56.0, 108.1, 110.6, 116.5, 118.4, 121.8, 125.1, 128.8, 132.5, 132.6, 141.5, 147.3, 152.7, 193.5 ppm.

**Compound (4f):** Mp: >300°C; IR (KBr, cm<sup>-1</sup>): 3486, 3044, 1646, 1614, 1591, 1566; <sup>1</sup>H NMR (400 MHz, DMSO) δ: 0.96 (s, 3H), 1.15 (s, 3H), 2.32-2.86 (m, 4H), 6.64 (s, 1H), 7.03-8.22 (m, 8H), 11.34 (s, 1H) ppm; <sup>13</sup>C NMR (100 MHz, DMSO) δ: 27.4, 32.7, 42.3, 50.5, 56.3, 110.3, 110.5, 116.4, 124.2, 125.6, 130.3, 135.5, 138.7, 141.6, 144.5, 144.8, 153.6, 193.4 ppm.

**Compound (4g):** Mp: >300°C; IR (KBr, cm<sup>-1</sup>): 3223, 3049, 2943, 1651, 1615, 1591, 1566; <sup>1</sup>H NMR (400 MHz, DMSO) δ: 0.93 (s, 3H), 1.08 (s, 3H), 2.06-2.28 (m, 2H), 2.49-2.64 (m, 2H), 6.45 (s, 1H), 7.01 (t, 1H), 7.09 (t, 1H), 6.97-7.30 (m, 3H), 7.39 (t, 2H), 7.60 (s, 1H), 11.15 (s, 1H) ppm; <sup>13</sup>C NMR (100 MHz, DMSO) δ: 27.9, 29.7, 32.8, 50.7, 56.2, 108.5, 110.6, 116.3, 118.4, 121.8, 125.3, 128.8, 132.7, 132.8, 141.5, 147.3, 152.9, 193.7 ppm.

**Compound (4h):** Mp: 346-349°C; IR (KBr, cm<sup>-1</sup>): 3231, 3049, 2931, 2864, 1647, 1616, 1590, 1565; <sup>1</sup>H NMR (400 MHz, DMSO) δ: 0.93 (s, 3H), 1.06 (s, 3H), 2.01-2.31 (m, 2H), 2.61-2.69 (m, 2H), 6.44 (s, 1H), 6.97 (t, 1H), 7.05 (t, 1H), 7.24-7.31 (m, 4H), 7.36-7.44 (m, 2H), 11.14 (s, 1H) ppm; <sup>13</sup>C NMR (100 MHz, DMSO) δ: 27.8, 32.2, 43.2, 52.5, 58.6, 112.1, 114.3, 118.3, 123.5, 123.2, 130.2, 139.1, 143.3, 144.7, 1463.2, 148.7, 154.5, 199.7 ppm.

**Compound (4i):** Mp: >300°C; IR (KBr, cm<sup>-1</sup>): 3360, 3048, 2957, 2863, 1626, 1617, 1591, 1564; <sup>1</sup>H NMR (400 MHz, DMSO) δ: 1.08 (s, 3H), 1.17 (s, 3H), 2.24-2.35 (dd, 2H), 2.76 (s, 2H), 6.47 (s, 1H), 7.11-7.77 (m, 8H), 10.92 (s, 1H) ppm; <sup>13</sup>C NMR (100 MHz, DMSO) δ: 26.9, 28.6, 31.9, 35.8, 50.3, 58.2, 112.4, 119.6, 125.5, 125.7, 126.3, 127.5, 127.7, 128.4, 132.5, 132.8, 142.2, 158.6, 158.8, 162.7, 196.2 ppm.

**Compound (4j):** Mp: 233-335°C; IR (KBr, cm<sup>-1</sup>): 3541, 3096, 2955, 2861, 1643, 1611, 1593, 1564; <sup>1</sup>H NMR (400 MHz, DMSO) δ: 0.93 (s, 3H), 1.06 (s, 3H), 2.12 (q, 2H), 2.55 (q, 2H), 2.65 (s, 3H), 6.52 (s, 1H), 6.88-7.37 (m, 8H), 11.12 (s, 1H) ppm; <sup>13</sup>C NMR (100 MHz, DMSO) δ: 21.3, 27.2, 29.1, 32.6, 40.2, 50.5, 54.2, 107.2, 110.6, 115.5, 117.2, 120.5, 122.2, 128.8, 132.7, 142.3, 145.5, 150.4, 157.3, 193.0 ppm.

**Compound (4k):** Mp: 240-243°C; IR (KBr, cm<sup>-1</sup>): 3434, 3095, 2954, 2899, 1645, 1616, 1591, 1568; <sup>1</sup>H NMR (400 MHz, DMSO) δ: 0.95 (s, 3H), 1.04 (s, 3H), 2.33 (s, 3H), 2.02-2.87 (m, 4H), 6.61 (s, 1H), 6.71-7.96 (m, 8H), 11.31 (s, 1H) ppm; <sup>13</sup>C NMR (100 MHz, DMSO) δ: 21.3, 27.4, 32.7, 42.9, 50.3, 56.9, 110.3, 110.4, 118.5, 123.2, 128.6, 134.2, 135.5, 138.8, 141.1, 152.7, 193.9 ppm.

**Compound (4l):** Mp: 318-322°C; IR (KBr, cm<sup>-1</sup>): 3432, 3093, 2956, 2892, 1645, 1611, 1594, 1566; <sup>1</sup>H NMR (400 MHz, DMSO) δ: 0.95 (s, 3H), 1.06 (s, 3H), 2.89-2.04 (m, 4H), 3.59 (s, 3H), 6.61 (s, 1H), 7.61- 6.82 (m, 8H), 11.30 (s, 1H) ppm; <sup>13</sup>C NMR (100 MHz, DMSO) δ: 27.2, 29.3, 32.8, 40.0, 50.3, 54.0, 55.9, 107.2, 110.4, 115.3, 117.2, 120.6, 122.4, 128.8, 132.7, 132.9, 142.5, 145.7, 150.7, 157.5, 193.0 ppm.

**Compound (4m):** Mp: 318-320°C; IR (KBr, cm<sup>-1</sup>): 3438, 3090, 2959, 2893, 1644, 1615, 1593, 1563; <sup>1</sup>H NMR (400 MHz, DMSO) δ: 0.95 (s, 3H), 1.06 (s, 3H), 2.04-2.89 (m, 4H), 3.61 (s, 3H), 6.76-7.61 (m, 8H), 6.63 (s, 1H), 11.31 (s, 1H) ppm; <sup>13</sup>C NMR (100 MHz, DMSO) δ: 27.3, 29.4, 32.9, 40.3, 50.6, 54.3, 55.8, 107.4, 110.7, 115.5, 117.6, 120.9, 122.5, 128.9, 132.4, 132.6, 142.8, 145.7, 150.6, 157.5, 193.1 ppm.

**Compound (4n):** Mp: 339-342°C; IR (KBr, cm<sup>-1</sup>): 3432, 3088, 2961, 2892, 1643, 1615, 1591, 1569; <sup>1</sup>H NMR (400 MHz, DMSO) δ: 0.94 (s, 3H), 1.04 (s, 3H), 2.01-2.86 (m, 4H), 3.57 (s, 3H), 6.61 (s, 1H), 6.71-7.96 (m, 8H), 11.29

(s, 1H) ppm; <sup>13</sup>C NMR (100 MHz, DMSO) δ: 32.7, 42.5, 50.7, 55.5, 56.3, 110.2, 110.5, 114.5, 118.6, 123.2, 130.4, 130.5, 134.4, 138.7, 141.1, 152.5, 157.6, 193.0 ppm.

**Compound (4o):** Mp: 338-341°C; IR (KBr, cm<sup>-1</sup>): 3426, 3087, 2960, 2893, 1644, 1616, 1592, 1564; <sup>1</sup>H NMR (400 MHz, DMSO) δ: 0.91 (s, 3H), 1.05 (s, 3H), 2.09 (d, 1H), 2.27 (d, 1H), 2.54-2.70 (m, 2H), 6.52 (s, 1H), 6.99 (t, 1H), 7.07 (t, 1H), 7.26-7.31 (m, 2H), 7.41 (d, 1H), 7.65 (tt, 1H), 8.39 (dd, 1H), 8.69 (d, 1H), 11.21 (s, 1H) ppm; <sup>13</sup>C NMR (100 MHz, DMSO) δ: 27.3, 29.2, 31.4, 33.0, 50.1, 52.4, 105.7, 110.3, 117.7, 121.3, 122.6, 124.3, 132.0, 134.7, 137.4, 142.3, 145.7, 148.9, 149.4, 151.4, 193.2 ppm.

**Compound 6a:** Mp: 232-334°C; IR (KBr, cm<sup>-1</sup>): 3028, 2960, 1663, 1619, 1468, 1420, 1361, 1307, 1274; <sup>1</sup>H-NMR (400 MHz, DMSO) δ: 1.20 (s, 3H), 1.21 (s, 3H), 2.35 (s, 2H), 3.28 (dd, 1H), 3.45 (d, 1H), 6.48 (s, 1H), 7.32-8.37 (m, 9H) ppm; <sup>13</sup>C NMR (100 MHz, DMSO) δ: 28.5, 28.7, 34.7, 38.0, 50.9, 64.9, 118.6, 127.3, 127.7, 127.8, 128.5, 128.8, 129.4, 133.8, 134.7, 136.4, 150.9, 154.3, 156.1, 192.3 ppm.

**Compound 6b:** Mp: 216-219°C; IR (KBr, cm<sup>-1</sup>): 1678, 1647, 1502, 1531, 1353, 1304, 1263; <sup>1</sup>H NMR (400 MHz, DMSO) δ: 1.19 (s, 3H), 1.21 (s, 3H), 2.33 (s, 2H), 3.26 (dd, 1H), 3.38 (d, 1H), 7.32-7.57 (m, 4H), 7.86-7.96 (m, 3H), 8.23-8.37 (m, 2H) ppm; <sup>13</sup>C NMR (100 MHz, DMSO) δ: 28.6, 28.7, 34.6, 38.0, 50.7, 60.7, 116.8, 125.3, 127.9, 128.3, 128.5, 129.1, 129.4, 130.6, 133.2, 133.7, 134.6, 149.4, 152.1, 154.3, 156.1, 191.8 ppm.

**Compound 6c:** Mp: 216-219°C; IR (KBr, cm<sup>-1</sup>): 3074, 2955, 1670, 1659, 1614, 1359, 1271; <sup>1</sup>H-NMR (400 MHz, DMSO) δ: 1.18 (s, 3H), 1.19 (s, 3H), 2.27 (s, 2H), 3.21 (dd, 1H), 3.34 (d, 1H), 6.49 (s, 1H), 7.58-8.34 (m, 8H) ppm; <sup>13</sup>C NMR (100 MHz, DMSO) δ: 28.5, 28.8, 34.6, 38.4, 51.7, 64.4, 116.8, 127.3, 127.5, 128.6, 128.9, 129.4, 129.8, 131.6, 132.7, 133.1, 133.6, 134.3, 135.4, 151.8, 154.4, 156.3, 192.0 ppm.

**Compound 6d:** Mp: 180-182°C; IR (KBr, cm<sup>-1</sup>): 3077, 2959, 1693, 1661, 1616, 1523, 1365, 1277; <sup>1</sup>H-NMR (400 MHz, DMSO) δ: 1.21 (s, 3H), 1.23 (s, 3H), 2.34 (s, 2H), 3.26 (dd, 1H), 3.44 (d, 1H), 6.51 (s, 1H), 7.56-8.41 (m, 8H) ppm; <sup>13</sup>C NMR (100 MHz, DMSO) δ: 28.5, 28.8, 34.6, 38.1, 50.7, 64.1, 117.4, 124.2, 127.7, 128.0, 128.4, 128.7, 128.8, 133.8, 134.7, 143.5, 147.8, 151.6, 154.5, 155.7, 192.0 ppm.

**Compound 6e:** Mp: 207-210°C; IR (KBr, cm<sup>-1</sup>): 3059, 2958, 2895, 1661, 1630, 1601, 1466, 1357, 1270; <sup>1</sup>H-NMR (400 MHz, DMSO) δ: 1.21 (s, 3H), 1.23 (s, 3H), 2.35 (s, 2H), 3.25 (dd, 1H), 3.43 (d, 1H), 6.66 (s, 1H), 7.23-8.40 (m, 8H) ppm; <sup>13</sup>C NMR (100 MHz, DMSO) δ: 28.4, 28.8, 34.6, 37.8, 50.7, 63.8, 116.5, 127.2, 127.6, 127.8, 128.5, 129.1, 129.7, 130.3, 132.6, 133.2, 133.4, 134.5, 151.9, 154.2, 156.0, 192.1 ppm.

**Compound 6f:** Mp: 212-214°C; IR (KBr, cm<sup>-1</sup>): 3068, 2956, 2873, 1658, 1627, 1579, 1463, 1361, 1312, 1269; <sup>1</sup>H-NMR (400 MHz, DMSO) δ: 1.21 (s, 3H), 1.22 (s, 3H), 2.35 (s, 2H), 3.22 (d, 1H), 3.40 (d, 1H), 6.41 (s, 1H), 7.23-7.85 (m, 6H), 8.25-8.38 (m, 2H) ppm; <sup>13</sup>C NMR (100 MHz, DMSO) δ: 28.6, 28.7, 34.6, 38.1, 50.8, 64.4, 117.8, 125.9, 127.1, 127.6, 128.2, 128.8, 129.1, 130.2, 133.8, 134.5, 138.6, 151.1, 154.5, 156.1, 192.0 ppm.

**Compound 6g:** Mp: 212-214°C; IR (KBr, cm<sup>-1</sup>): 3036, 2959, 1688, 1653, 1624, 1466, 1391, 1363, 1312, 1269; <sup>1</sup>H-NMR (400 MHz, DMSO) δ: 1.23 (s, 3H), 1.24 (s, 3H), 2.36 (s, 2H), 3.27 (dd, 1H), 3.44 (d, 1H), 6.44 (s, 1H), 7.32-8.39 (m, 8H) ppm; <sup>13</sup>C NMR (100 MHz, DMSO) δ: 28.7, 28.9, 34.7, 38.0, 50.7, 64.3, 118.1, 127.8, 128.3, 128.5, 128.7, 128.9, 129.2, 133.9, 134.3, 134.5, 134.8, 151.1, 154.5, 156.2, 192.2 ppm.

**Compound 6h:** Mp: 208-211°C; IR (KBr, cm<sup>-1</sup>): 3066, 2957, 2871, 1658, 1625, 1574, 1463, 1362, 1311, 1264; <sup>1</sup>H NMR (400 MHz, DMSO) δ: 1.20 (s, 3H), 1.22 (s, 3H), 2.33 (s, 2H), 3.22 (d, 1H), 3.41 (d, 1H), 6.41 (s, 1H), 7.22-7.37 (m, 4H), 7.86 (dd, 2H), 8.25-8.37 (m, 2H) ppm; <sup>13</sup>C NMR (100 MHz, DMSO) δ: 28.3, 28.5, 34.6, 38.1, 50.8, 64.0, 117.8, 125.4, 127.1, 127.6, 128.1, 128.5, 129.1, 130.2, 133.5, 134.7, 138.0, 151.3, 154.5, 156.1, 192.1 ppm.

**Compound 6i:** Mp: 208-211°C; IR (KBr, cm<sup>-1</sup>): 2958, 1653, 1624, 1468, 1408, 1387, 1362, 1312, 1268; <sup>1</sup>H-NMR (400 MHz, DMSO) δ: 1.21 (s, 3H), 1.22 (s, 3H), 2.34 (s, 2H), 3.24 (dd, 1H), 3.41 (d, 1H), 6.42 (s, 1H), 7.31-8.38 (m, 8H) ppm; <sup>13</sup>C NMR (100 MHz, DMSO) δ: 28.4, 28.6, 34.5, 38.0, 50.9, 64.6, 118.2, 122.9, 127.7, 128.1, 128.7, 128.9, 129.2, 131.8, 133.6, 134.9, 135.4, 151.1, 154.3, 156.2, 192.1 ppm.

**Compound 6j:** Mp: 208-211°C; IR (KBr, cm<sup>-1</sup>): 3071, 2961, 2878, 1666, 1627, 1602, 1510, 1469, 1357, 1312, 1269; <sup>1</sup>H-NMR (400 MHz, DMSO) δ: 1.20 (s, 3H), 1.21 (s, 3H), 2.35 (s, 2H), 3.25 (dd, 1H), 3.43 (d, 1H), 6.43 (s, 1H), 7.01-8.33 (m, 8H) ppm; <sup>13</sup>C NMR (100 MHz, DMSO) δ: 28.4, 28.7, 34.5, 38.2, 50.8, 64.3, 115.7, 115.8, 118.4, 127.7, 128.1, 128.8, 129.3, 132.1, 133.6, 134.8, 151.1, 154.5, 156.2, 192.4 ppm.

**Compound 6k:** Mp: 225-229°C; IR (KBr, cm<sup>-1</sup>): 3046, 2959, 1662, 1601, 1468, 1358, 1312, 1276; <sup>1</sup>H-NMR (400 MHz, DMSO) δ: 1.20 (s, 3H), 1.22 (s, 3H), 2.32 (s, 2H), 2.76 (s, 3H), 3.24 (dd, 1H), 3.45 (d, 1H), 6.62 (s, 1H), 7.00-7.82 (m, 6H), 8.22 (dd, 1H), 8.37 (dd, 1H) ppm; <sup>13</sup>C NMR (100 MHz, DMSO) δ: 19.4, 28.2, 28.7, 34.6, 38.1, 50.8, 61.4, 119.9, 125.0, 126.3, 127.5, 128.1, 128.5, 129.1, 129.0, 130.7, 133.4, 134.6, 135.2, 137.2, 150.5, 154.1, 156.1, 192.2 ppm.

**Compound 6l:** Mp: 217-220°C; IR (KBr, cm<sup>-1</sup>): 2957, 1661, 1628, 1466, 1358, 1311, 1271; <sup>1</sup>H-NMR (400 MHz, DMSO) δ: 1.21 (s, 3H), 1.23 (s, 3H), 2.32 (s, 3H), 2.35 (s, 2H), 3.25 (dd, 1H), 3.41 (d, 1H), 6.45 (s, 1H), 7.12-8.35 (m, 8H) ppm; <sup>13</sup>C NMR (100 MHz, DMSO) δ: 21.5, 28.7, 28.8, 34.7, 38.3, 50.8, 64.8, 118.9, 127.3, 127.7, 127.9, 129.1, 129.4, 129.7, 133.6, 133.8, 134.5, 138.7, 150.8, 154.2, 156.3, 192.2 ppm.

**Compound 6m:** Mp: 203-205°C; IR (KBr, cm<sup>-1</sup>): 3045, 2958, 1661, 1602, 1470, 1359, 1315, 1276; <sup>1</sup>H-NMR (400 MHz, DMSO) δ: 1.20 (s, 3H), 1.22 (s, 3H), 2.31 (s, 2H), 3.26 (dd, 1H), 3.45 (d, 1H), 3.6 (s, 3H), 6.63 (s, 1H), 7.01-7.83 (m, 6H), 8.23 (dd, 1H), 8.36 (dd, 1H) ppm; <sup>13</sup>C NMR (100 MHz, DMSO) δ: 19.3, 28.8, 34.7, 38.1, 50.9, 55.8, 61.3, 119.8, 125.1, 126.4, 127.6, 128.0, 128.5, 129.0, 129.1, 130.8, 133.6, 134.5, 135.2, 137.1, 150.7, 154.1, 156.0, 192.1 ppm.

**Compound 6n:** Mp: 223-225°C; IR (KBr, cm<sup>-1</sup>): 3044, 2959, 1658, 1626, 1353, 1311, 1272; <sup>1</sup>H NMR (400 MHz, DMSO) δ: 1.21 (s, 3H), 1.23 (s, 3H), 2.33 (s, 2H), 3.21 (d, 1H), 3.39 (d, 1H), 3.79 (s, 3H), 6.43 (s, 1H), 6.74-6.84 (m, 1H), 6.91-7.03 (m, 2H), 7.18-7.28 (m, 1H), 7.85-7.88 (m, 2H), 8.25-8.36 (m, 2H) ppm; <sup>13</sup>C NMR (100 MHz, DMSO) δ: 28.4, 28.6, 34.6, 38.1, 50.8, 55.3, 64.9, 113.2, 113.7, 118.6, 119.5, 127.8, 128.1, 129.2, 129.6, 133.4, 134.6, 138.1, 150.9, 154.4, 156.1, 159.8, 192.1 ppm.

**Compound 6o:** Mp: 237-239°C; IR (KBr, cm<sup>-1</sup>): 3045, 2958, 1657, 1627, 1354, 1312, 1275; <sup>1</sup>H NMR (400 MHz, DMSO) δ: 1.20 (s, 3H), 1.22 (s, 3H), 2.34 (s, 2H), 3.23 (d, 1H), 3.44 (d, 1H), 3.78 (s, 3H) 6.42 (s, 1H), 6.85-8.35 (m, 8H) ppm; <sup>13</sup>C NMR (100 MHz, DMSO) δ : 28.6, 28.8, 34.6, 51.39, 55.3, 64.3, 115, 118.4, 127.7, 127.8, 128.3, 128.5, 128.9, 129.2, 133.1, 134.2, 150.2, 154.4, 156.5, 158.2, 192.2 ppm.

**Compound 6p:** Mp: 146-149°C; IR (KBr, cm<sup>-1</sup>): 3044, 2962, 1665, 1623, 1353, 1311, 1274; <sup>1</sup>H NMR (400 MHz, DMSO) δ: 0.73-0.78 (t, 3H), 1.22 (s, 3H), 1.42 (s, 3H), 2.08-2.18 (m, 1H), 2.37 (m, 2H), 2.37 (s, 2H) 2.52-2.59 (m, 1H), 3.12-3.38 (dd, 2H), 5.71-5.73 (m, 1H), 7.84-7.92 (m, 2H), 8.32-8.38 (m, 2H) ppm; <sup>13</sup>C NMR (100 MHz, DMSO) δ : 7.3, 22.2, 28.2, 28.7, 34.5, 38.2, 51.1, 63.4, 117.7, 127.4, 127.9, 128.8, 129.1, 133.5, 134.3, 151.9, 155.3, 156.6, 192.1 ppm.
